# Supplementary material for: Association of Alleles of Human Leukocyte Antigen Class II Genes and Severity of COVID-19 in Patients of the ‘Red Zone’ of the Endocrinology Research Center, Moscow, Russia
Source: MDPI journal article supplement (doi:10.3390/diseases10040099), 2022-11-02
Supplement: s1 [file s1]

**Table S1.** Clinical characteristics, anamnestic data and results of HLA typing for COVID-19 patients included in the study.

| No | Age, years | Sex | BMI, kg / m2 | Weight, kg | Smoking (yes / no) | Outcome (improvement/ fatal) | IMV (yes/no) | Duration of hospital stay, days | tomography during hospitalization | Maximum lung CT lesion Group (1 -, moderate, 2 - severe) | Endocrine AID | Nonendocrine AID | ED of nonautoimmune origin             | CVD                         | OD | LD                                 | CRP at admission, mg/L | SARS-CoV-2 viral RNA at admission, % | DRB1 - allele 1 | DRB1 - allele 2 | DQA1 - allele 1 | DQA1 - allele 2 | DQB1 - allele 1 | DQB1 - allele 2 |
|----|------------|-----|--------------|------------|--------------------|------------------------------|--------------|---------------------------------|-----------------------------------|----------------------------------------------------------|---------------|------------------|----------------------------------------|-----------------------------|----|------------------------------------|------------------------|--------------------------------------|-----------------|-----------------|-----------------|-----------------|-----------------|-----------------|
| 1  | 80         | f   | 35,2         | 90         | no                 | improvement                  | n            | 11                              | 2 4                               | 2                                                        | AT            | no               | obesity, nodular goiter                | AH                          | no | history of tuberculosis, emphysema | 197,6g                 | 99                                   | 03              | 16              | 05:01           | 01:02           | 05:02/05:04     |                 |
| 2  | 89         | f   | 23,4         | 60         | no                 | improvement                  | n            | 12                              | 2 2                               | 1                                                        | no            | no               | no                                     | AH, CHF, CHD, ACVA          | no | pulmonary hypertension             | 74,2g                  | 89                                   | 07              | 13              | 02:01           | 05:01           | 02              | 03:01           |
| 3  | 64         | m   | 25,4         | 75         | no                 | improvement                  | n            | 16                              | 3 3                               | 2                                                        | no            | psoriasis        | no                                     | CHD, aortic atherosclerosis | no | no                                 | 128,8s                 | 96                                   | 04              | 07              | 03:01           | 02:01           | 03:01           | 02              |
| 4  | 48         | m   | 22           | 65         | no                 | improvement                  | n            | 12                              | 2 2                               | 1                                                        | no            | no               | no                                     | no                          | no | no                                 | 81,3g                  | 95                                   | 13              | 15              | 01:03           | 01:03           | 06:02-8         | 06:01           |
| 5  | 46         | m   | 26,2         | 94         | no                 | improvement                  | n            | 15                              | 3 3                               | 2                                                        | no            | no               | no                                     | no                          | no | no                                 | 62,8s                  | 94                                   | 11              | 15              | 05:01           | 01:02           | 03:01           | 06:02-8         |
| 6  | 70         | f   | 35,2         | 90         | no                 | improvement                  | n            | 14                              | 1 2                               | 1                                                        | no            | no               | obesity, secondary hyperparathyroidism | AH, ACVA                    | no | no                                 | 19,8g                  | 99                                   | 11              | 16              | 05:01           | 01:02           | 03:01           | 05:02/05:04     |
| 7  | 76         | m   | 24,7         | 73         | no                 | improvement                  | n            | 14                              | 3 3                               | 2                                                        | no            | no               | no                                     | CHD, RBBB                   | no | emphysema                          | 58,3s                  | 95                                   | 15              | 15              | 01:02           | 01:02           | 06:02-8         | 06:02-8         |
| 8  | 66         | f   | 25,4         | 65         | no                 | improvement                  | n            | 14                              | 3 2                               | 1                                                        | no            | no               | secondary hyperparathyroidism          | AH, CHD                     | no | no                                 | 36,2s                  | 99                                   | 07              | 12              | 02:01           | 05:01           | 03:03           | 03:01           |
| 9  | 80         | m   | 26,          | 72         | N                  | improvement                  | n            | 26                              | 6 3                               | 2                                                        | no            | no               | no                                     | AH, CHF,                    | no | history of                         | 80,5ne                 | 96                                   | 11              | 16              | 05:0            | 01:0            | 03:01           | 05:02/05:0      |

|    |    |   |      |     |    |             |    |    |   |   |   |    |                        |                              |         |              |                                                                                                                              |          |    |    |    |       |       |       |         |
|----|----|---|------|-----|----|-------------|----|----|---|---|---|----|------------------------|------------------------------|---------|--------------|------------------------------------------------------------------------------------------------------------------------------|----------|----|----|----|-------|-------|-------|---------|
|    |    |   | 8    |     | D  | ent         | o  |    |   |   |   |    |                        | CHD                          |         | tuberculosis | g                                                                                                                            |          |    |    | 1  | 2     |       |       | 4       |
| 10 | 71 | m | 25,4 | 70  | no | improvement | no | 20 | 4 | 3 | 2 | no | Guillain-Barre disease | no                           | AH      | no           | chronic bronchitis, post-traumatic reduction of the left lung sizes with areas of pulmonary fibrosis, pulmonary hypertension | 144,ne4g | 92 | 07 | 11 | 02:01 | 05:01 | 02    | 03:01   |
| 11 | 83 | m | 23,5 | 64  | no | improvement | no | 10 | 1 | 3 | 2 | no | no                     | no                           | AH      | no           | no                                                                                                                           | 141,ne9g | 94 | 11 | 13 | 05:01 | 01:02 | 03:01 | 06:02-8 |
| 12 | 55 | f | 30,8 | 77  | no | improvement | no | 11 | 2 | 2 | 1 | no | no                     | DM2, obesity, nodular goiter | AH, CHD | no           | no                                                                                                                           | po63,4s  | 93 | 04 | 07 | 03:01 | 02:01 | 03:02 | 03:03   |
| 13 | 50 | f | 42,2 | 108 | N  | improvement | no | 10 | 2 | 2 | 1 | no | no                     | obesity                      | no      | no           | no                                                                                                                           | po95,6s  | 92 | 04 | 07 | 03:01 | 02:01 | 03:02 | 02      |
| 14 | 51 | m | 23   | 70  | no | improvement | no | 11 | 2 | 2 | 1 | no | no                     | no                           | no      | no           | chronic bronchitis, history of tuberculosis                                                                                  | ne7,1g   | 40 | 03 | 13 | 05:01 | 01:03 | 02    | 06:02-8 |
| 15 | 40 | m | 30   | 95  | no | improvement | no | 8  | 2 | 1 | 1 | no | no                     | obesity, DM2                 | AH      | no           | no                                                                                                                           | ne21,8g  | 91 | 04 | 11 | 03:01 | 05:01 | 03:02 | 03:01   |
| 16 | 51 | m | 26,6 | 102 | no |             | no | 14 | 2 | 3 | 2 | no | no                     | no                           | AH      | no           | resection of the lower lobe of the left lung for a history of spontaneous pneumothorax, pulmonary hypertension, emphysema    | 259,po5s | 95 | 03 | 11 | 05:01 | 05:01 | 02    | 03:01   |

|    |    |   |      |      |     |             |     |    |   |   |   |    |                     |                                        |                             |                  |                        |        |    |    |    |       |       |       |             |
|----|----|---|------|------|-----|-------------|-----|----|---|---|---|----|---------------------|----------------------------------------|-----------------------------|------------------|------------------------|--------|----|----|----|-------|-------|-------|-------------|
| 17 | 61 | f | 31,6 | 83   | no  | improvement | no  | 14 | 2 | 3 | 2 | no | BA                  | obesity, diffuse goiter                | AH                          | no               | BA                     | 14,4g  | 88 | 11 | 16 | 05:01 | 01:02 | 03:01 | 05:02/05:04 |
| 18 | 54 | f | 64   | 185  | no  | improvement | no  | 13 | 2 | 3 | 2 | no | no                  | obesity, DM2                           | AH                          | no               | no                     | 64,7s  | 88 | 01 | 01 | 01:01 | 01:01 | 05:01 | 05:01       |
| 19 | 71 | f | 26,2 | 74   | no  | improvement | no  | 13 | 2 | 2 | 1 | no | AT                  | nodular goiter                         | AH                          | no               | no                     | 58,7s  | 99 | 01 | 03 | 01:01 | 05:01 | 05:01 | 02          |
| 20 | 65 | m | 26,5 | 84   | no  | improvement | no  | 19 | 3 | 3 | 2 | no | no                  | no                                     | no                          | no               | no                     | 80,1s  | 92 | 04 | 15 | 03:01 | 01:03 | 03:02 | 06:01       |
| 21 | 75 | f | 37,5 | 90   | no  | fatal       | yes | 20 | 1 | 4 | 2 | no | no                  | DM2, obesity                           | CHD, aortic atherosclerosis | no               | no                     | 73,1s  | 92 | 07 | 15 | 02:01 | 01:02 | 02    | 06:02-8     |
| 22 | 54 | f | 23,2 | 61   | no  | improvement | no  | 7  | 2 | 2 | 1 | no | no                  | no                                     | no                          | no               | no                     | 61,9g  | 98 | 04 | 11 | 03:01 | 05:01 | 03:02 | 03:05       |
| 23 | 62 | f | 28   | 70   | no  | improvement | no  | 13 | 2 | 2 | 1 | no | Bechterew's disease | DM2                                    | CHD, AH                     | BC               | emphysema              | 13,7s  | 93 | 01 | 11 | 01:01 | 05:01 | 05:01 | 03:01       |
| 24 | 59 | f | 31,6 | 85   | N D | improvement | no  | 15 | 2 | 3 | 2 | no | no                  | obesity                                | no                          | no               | pulmonary hypertension | 79,5s  | 96 | 03 | 07 | 05:01 | 02:01 | 02    | 02          |
| 25 | 73 | f | 32   | 82   | N D | improvement | no  | 11 | 1 | 3 | 2 | no | no                  | obesity, secondary hyperparathyroidism | AH                          | no               | no                     | 57,1g  | 84 | 01 | 01 | 01:01 | 01:01 | 05:01 | 05:01       |
| 26 | 49 | m | 33   | 105  | no  | improvement | no  | 13 | 3 | 4 | 2 | no | no                  | obesity                                | no                          | chronic leukemia | no                     | 58,2s  | 90 | 04 | 13 | 03:01 | 01:03 | 03:01 | 06:02-8     |
| 27 | 42 | f | 23,7 | 67   | no  | improvement | no  | 9  | 2 | 2 | 1 | no | BA                  | no                                     | no                          | no               | BA                     | 6,1g   | 95 | 11 | 15 | 05:01 | 01:02 | 03:01 | 06:02-8     |
| 28 | 40 | f | 29,8 | 85,1 | N D | improvement | no  | 12 | 2 | 2 | 1 | no | no                  | no                                     | no                          | no               | no                     | 8,9g   | 92 | 01 | 03 | 01:01 | 05:01 | 05:01 | 02          |
| 29 | 75 | f | 39   | 90   | N D | improvement | no  | 12 | 2 | 3 | 2 | no | no                  | obesity                                | AH, ACVA                    | no               | chronic bronchitis     | 1,5g   | 97 | 01 | 04 | 01:01 | 03:01 | 05:01 | 03:02       |
| 30 | 48 | m | 33,1 | 105  | no  | improvement | no  | 6  | 2 | 2 | 1 | no | no                  | obesity                                | AH                          | no               | no                     | 13,9s  | 95 | 01 | 11 | 01:01 | 05:01 | 05:01 | 03:01       |
| 31 | 46 | f | 30,3 | 94   | no  | improvement | no  | 15 | 2 | 3 | 2 | no | no                  | obesity                                | no                          | no               | no                     | 287,3s | 93 | 03 | 04 | 05:01 | 03:01 | 02    | 03:02       |

|    |    |   |      |       |    |             |    |    |   |   |   |    |    |                                  |                                               |                            |                        |        |        |    |    |       |       |       |             |             |
|----|----|---|------|-------|----|-------------|----|----|---|---|---|----|----|----------------------------------|-----------------------------------------------|----------------------------|------------------------|--------|--------|----|----|-------|-------|-------|-------------|-------------|
| 32 | 66 | f | 33,7 | 79    | no | improvement | no | 11 | 1 | 1 | 1 | no | no | Cushing's disease, obesity , DM2 | AH, CHD, CHF                                  | no                         | subpleural lipoma      | 2,1g   | 97     | 07 | 16 | 02:01 | 01:02 |       | 05:02/05:04 |             |
| 33 | 41 | f | 28   | 80    | no | improvement | no | 13 | 2 | 2 | 1 | AT | no | multinodular goiter              | no                                            | no                         | no                     | 29,6s  | 97     | 03 | 15 | 05:01 | 01:03 |       | 06:01       |             |
| 34 | 85 | f | 30,2 | 68    | no | improvement | no | 15 | 1 | 3 | 2 | AT | no | obesity                          | AH                                            | no                         | pulmonary hypertension | 114,4g | 95     | 04 | 13 | 03:01 | 05:01 | 03:02 | 03:01       |             |
| 35 | 37 | m | 24,5 | 76    | ND | improvement | no | 14 | 4 | 3 | 2 |    | no | no                               | no                                            | AH                         | no                     | no     | 194,9s | 95 | 01 | 11    | 01:01 | 05:01 | 05:01       | 03:01       |
| 36 | 38 | m | 24,1 | 73    | no | improvement | no | 7  | 1 | 1 | 1 |    | no | no                               | no                                            | no                         | no                     | 5,5g   | 99     | 11 | 13 | 05:01 | 01:03 | 03:01 | 06:02-8     |             |
| 37 | 43 | f | 30,1 | 82    | no | improvement | no | 20 | 3 | 3 | 2 |    | no | no                               | obesity                                       | no                         | no                     | 188,6g | 88     | 01 | 15 | 01:01 | 01:02 | 05:01 | 06:02-8     |             |
| 38 | 82 | m | 34   | 90    | ND | improvement | no | 18 | 3 | 4 | 2 |    | no | no                               | obesity                                       | CHD, Frederick's syndrome  | no                     | no     | 92,5s  | 76 | 11 | 16    | 05:01 | 01:02 | 03:01       | 05:02/05:04 |
| 39 | 53 | f | 20,4 | 55    | no | improvement | no | 10 | 2 | 2 | 1 |    | no | psoriatic arthritis              | no                                            | lower limb atherosclerosis | no                     | no     | 166,2s | 94 | 01 | 10    | 01:01 | 01:01 | 05:01       | 05:01       |
| 40 | 63 | m | 28,1 | 87    | no | improvement | no | 13 | 2 | 2 | 1 |    | no | no                               | no                                            | AH                         | no                     | no     | 13,9s  | 92 | 12 | 15    | 05:01 | 01:02 | 03:01       | 06:02-8     |
| 41 | 43 | f | 33,1 | 99    | no | improvement | no | 13 | 2 | 3 | 2 |    | no | no                               | obesity                                       | no                         | pulmonary hypertension | 56,5s  | 95     | 07 | 15 | 02:01 | 01:03 | 02    | 06:01       |             |
| 42 | 60 | m | 28,7 | 89    | no | improvement | no | 11 | 2 | 1 | 1 |    | no | no                               | nodular goiter                                | AH, aortic atherosclerosis | no                     | no     | 13,4g  | 98 | 01 | 11    | 01:01 | 05:01 | 05:01       | 03:01       |
| 43 | 70 | f | 41,6 | 116   | ND | improvement | no | 18 | 4 | 3 | 2 |    | no | no                               | obesity                                       | AH                         | no                     | no     | 255,4g | 92 | 13 | 13    | 01:03 | 01:03 | 06:02-8     | 06:02-8     |
| 44 | 71 | f | 20,8 | 58    | no | improvement | no | 15 | 3 | 3 | 2 |    | no | no                               | secondary hyperparathyroidism, nodular goiter | AH, CHD                    | no                     | no     | 44,7s  | 99 | 01 | 10    | 01:01 | 01:01 | 05:01       | 05:01       |
| 45 | 46 | m | 36,3 | 112,5 | ND | improvement | no | 14 | 1 | 2 | 1 |    | no | no                               | obesity                                       | AH                         | no                     | no     | 23,9s  | 92 | 13 | 15    | 01:03 | 01:02 | 06:02-8     | 06:02-8     |
| 46 | 51 | f | 27,3 | 79    | no | improvement | no | 11 | 3 | 2 | 1 |    | no | no                               | no                                            | AH                         | no                     | no     | 1,7g   | 95 | 13 | 15    | 01:03 | 01:02 | 06:02-8     | 06:02-8     |

|    |    |   |      |     |     |             |     |    |   |   |   |    |    |                                        |                                 |    |                    |        |    |    |    |    |       |       |             |             |
|----|----|---|------|-----|-----|-------------|-----|----|---|---|---|----|----|----------------------------------------|---------------------------------|----|--------------------|--------|----|----|----|----|-------|-------|-------------|-------------|
| 47 | 57 | f | 23,7 | 67  | no  | improvement | no  | 10 | 1 | 2 | 1 | no | no | nodular goiter                         | no                              | no | no                 | 51,3s  | po | 90 | 08 | 15 | 04:01 | 01:02 | 04:01/04:02 | 06:02-8     |
| 48 | 53 | m | 23,8 | 79  | ND  | improvement | no  | 11 | 2 | 3 | 2 | no | no | no                                     | no                              | no | no                 | 34,6s  | po | 92 | 03 | 08 | 05:01 | 03:01 | 02          | 03:02       |
| 49 | 47 | m | 32,9 | 102 | no  | improvement | no  | 12 | 2 | 3 | 2 | no | no | obesity                                | no                              | no | no                 | 14,6s  | po | 96 | 07 | 08 | 02:01 | 04:01 | 02          | 04:01/04:02 |
| 50 | 42 | m | 24,6 | 78  | ND  | improvement | no  | 12 | 2 | 2 | 1 | no | no | no                                     | no                              | no | no                 | 13,8s  | po | 99 | 01 | 03 | 01:01 | 05:01 | 05:01       | 02          |
| 51 | 47 | f | 23   | 68  | no  | improvement | no  | 11 | 2 | 2 | 1 | no | no | no                                     | no                              | no | no                 | 31,8s  | po | 95 | 04 | 15 | 03:01 | 01:03 | 03:02       | 06:01       |
| 52 | 35 | m | 23   | 85  | ND  | improvement | no  | 13 | 2 | 3 | 2 | no | no | no                                     | no                              | no | no                 | 133,4g | ne | 92 | 03 | 03 | 05:01 | 05:01 | 02          | 02          |
| 53 | 71 | m | 30,5 | 85  | yes | improvement | no  | 12 | 2 | 2 | 1 | no | no | obesity                                | AH, CHD                         | no | emphysema          | 80,2g  | ne | 93 | 01 | 11 | 01:01 | 05:01 | 05:01       | 03:01       |
| 54 | 59 | m | 37   | 120 | ND  | improvement | no  | 18 | 2 | 4 | 2 | no | no | DM2, obesity                           | AH                              | no | no                 | 53,1g  | ne | 82 | 13 | 15 | 01:02 | 01:02 | 06:02-8     | 06:02-8     |
| 55 | 83 | f | 32   | 92  | ND  | fatal       | yes | 20 | 2 | 4 | 2 | no | no | obesity, secondary hyperparathyroidism | AH                              | no | no                 | 143,4s | po | 93 | 07 | 11 | 02:01 | 05:01 | 02          | 03:01       |
| 56 | 58 | m | 38,7 | 120 | no  | improvement | no  | 13 | 2 | 3 | 2 | no | no | obesity                                | AI, CHD, aortic atherosclerosis | no | no                 | 84,9s  | po | 97 | 12 | 15 | 05:01 | 01:02 | 03:01       | 06:02-8     |
| 57 | 60 | m | 34,3 | 111 | ND  | improvement | no  | 11 | 2 | 3 | 2 | no | no | DM2, obesity                           | AH                              | no | no                 | 237,8s | po | 95 | 13 | 13 | 01:03 | 05:01 | 06:02-8     | 03:01       |
| 58 | 52 | m | 26,2 | 85  | no  | improvement | no  | 10 | 2 | 2 | 1 | no | no | secondary hyperparathyroidism          | AH                              | no | no                 | 85,9s  | po | 99 | 03 | 11 | 05:01 | 05:01 | 02          | 03:01       |
| 59 | 75 | f | 30,8 | 87  | no  | improvement | no  | 18 | 3 | 4 | 2 | no | no | DM2, obesity                           | AH                              | no | no                 | 152,7s | po | 92 | 10 | 11 | 01:01 | 05:01 | 05:01       | 03:01       |
| 60 | 55 | m | 30,2 | 100 | no  | improvement | no  | 15 | 2 | 4 | 2 | no | no | obesity                                | no                              | no | no                 | 38,9s  | po | 95 | 01 | 15 | 01:01 | 01:02 | 05:01       | 06:02-8     |
| 61 | 51 | m | 36,2 | 112 | no  | improvement | no  | 13 | 1 | 2 | 1 | no | no | obesity                                | no                              | no | chronic bronchitis | 94,1g  | ne | 99 | 08 | 13 | 04:01 | 01:03 | 04:01/04:02 | 06:02-8     |

|    |    |   |      |     |     |             |    |    |   |   |   |    |        |                                                        |                                 |    |                             |        |    |    |    |    |       |       |             |             |
|----|----|---|------|-----|-----|-------------|----|----|---|---|---|----|--------|--------------------------------------------------------|---------------------------------|----|-----------------------------|--------|----|----|----|----|-------|-------|-------------|-------------|
| 62 | 62 | f | 29,7 | 79  | no  | improvement | no | 15 | 3 | 4 | 2 | no | no     | nodular goiter                                         | no                              | no | pulmonary hypertension      | 139,3s | po | 91 | 13 | 15 | 01:03 | 01:02 | 06:02-8     | 06:02-8     |
| 63 | 46 | m | 28,7 | 95  | ND  | improvement | no | 10 | 2 | 2 | 1 | no | no     | no                                                     | no                              | no | no                          | 139,6g | ne | 93 | 01 | 15 | 01:01 | 01:02 | 05:01       | 06:02-8     |
| 64 | 45 | m | 35,5 | 180 | no  | improvement | no | 10 | 1 | 2 | 1 | no | no     | obesity, secondary hyperparathyroidism                 | pulmonary artery embolism.      | no | no                          | 22,1s  | po | 91 | 16 | 16 | 01:02 | 01:02 | 05:02/05:04 | 05:02/05:04 |
| 65 | 96 | f | 38   | 96  | no  | improvement | no | 10 | 2 | 3 | 2 | AT | BA     | obesity, nodular goiter                                | AH, CHD, CHF                    | no | BA, history of tuberculosis | 25,9s  | po | 95 | 15 | 15 | 01:02 | 01:02 | 06:02-8     | 06:02-8     |
| 66 | 59 | m | 26,8 | 85  | no  | improvement | no | 11 | 3 | 3 | 2 | no | no     | no                                                     | CHD                             | no | no                          | 50,9s  | po | 94 | 07 | 07 | 02:01 | 02:01 | 02          | 02          |
| 67 | 80 | f | 36,6 | 102 | ND  | improvement | no | 15 | 1 | 3 | 2 | no | no     | obesity, nodular goiter, secondary hyperparathyroidism | AH, CHD, aortic atherosclerosis | no | no                          | 79,4s  | po | 93 | 11 | 12 | 05:01 | 05:01 | 03:01       | 03:01       |
| 68 | 59 | f | 20,9 | 57  | no  | improvement | no | 13 | 3 | 2 | 1 | no | no     | no                                                     | no                              | no | no                          | 77,1s  | po | 97 | 01 | 07 | 01:01 | 02:01 | 05:01       | 02          |
| 69 | 38 | m | 31,4 | 95  | yes | improvement | no | 10 | 1 | 3 | 2 | no | no     | obesity                                                | AH                              | no | no                          | 25,8g  | ne | 98 | 04 | 07 | 03:01 | 02:01 | 03:02       | 02          |
| 70 | 57 | f | 25   | 64  | no  | improvement | no | 14 | 2 | 2 | 1 | no | no     | no                                                     | no                              | no | no                          | 34,2s  | po | 94 | 07 | 09 | 02:01 | 03:01 | 02          | 03:03       |
| 71 | 58 | m | 26,4 | 80  | ND  | improvement | no | 23 | 3 | 4 | 2 | no | BA     | no                                                     | AH                              | no | BA                          | 66,7g  | ne | 95 | 03 | 04 | 05:01 | 03:01 | 02          | 03:02       |
| 72 | 35 | m | 23,7 | 90  | yes | improvement | no | 14 | 4 | 3 | 2 | no | no     | no                                                     | AH                              | no | no                          | 232,1s | po | 92 | 12 | 15 | 05:01 | 01:02 | 03:01       | 06:02-8     |
| 73 | 58 | f | 26,4 | 71  | no  | improvement | no | 9  | 1 | 2 | 1 | no | no     | no                                                     | no                              | no | no                          | 82,2g  | ne | 97 | 03 | 03 | 05:01 | 05:01 | 02          | 02          |
| 74 | 45 | m | 30,9 | 100 | no  | improvement | no | 10 | 3 | 3 | 2 | no | no     | obesity                                                | no                              | no | no                          | 89,1s  | po | 97 | 08 | 13 | 04:01 | 05:01 | 04:01/04:02 | 03:01       |
| 75 | 34 | m | 27,7 | 82  | ND  | improvement | no | 12 | 2 | 4 | 2 | no | no     | no                                                     | no                              | no | no                          | 250,6g | ne | 85 | 03 | 14 | 05:01 | 01:01 | 02          | 05:03       |
| 76 | 81 | f | 27   | 64  | ND  | improvement | no | 17 | 4 | 3 | 2 | no | RA, BA | secondary hyperparathyroidism                          | AH                              | no | BA                          | 125,1s | po | 92 | 04 | 15 | 03:01 | 03:01 | 03:04       | 06:02-8     |

|    |    |   |      |      |     |             |     |    |   |   |   |  |    | m                                                    |                                           |    |    |  |    |        |    |    |    |  |       |       |  |         |  |  |         |  |
|----|----|---|------|------|-----|-------------|-----|----|---|---|---|--|----|------------------------------------------------------|-------------------------------------------|----|----|--|----|--------|----|----|----|--|-------|-------|--|---------|--|--|---------|--|
| 77 | 68 | f | 26   | 75   | N D | improvement | no  | 12 | 1 | 3 | 2 |  | no | DM2, multinodular goiter                             | AH                                        | no | no |  | po | 76,8s  | 92 | 03 | 15 |  | 05:01 | 01:02 |  | 02      |  |  | 06:02-8 |  |
| 78 | 48 | m | 39,9 | 118  | N D | improvement | no  | 13 | 2 | 3 | 2 |  | no | obesity                                              | AH                                        | no | no |  | po | 22,5s  | 97 | 08 | 11 |  | 06:01 | 05:01 |  | 03:01   |  |  | 03:01   |  |
| 79 | 36 | m | 33,9 | 98   | no  | improvement | no  | 14 | 1 | 1 | 1 |  | no | obesity                                              | no                                        | no | no |  | ne | 203,5g | 94 | 01 | 11 |  | 01:01 | 05:01 |  | 05:01   |  |  | 03:01   |  |
| 80 | 78 | f | 24   | 70   | N D | improvement | no  | 13 | 2 | 2 | 1 |  | AT | no                                                   | AH, CHD, aortic atherosclerosis           | no |    |  | po | 79,5s  | 92 | 07 | 15 |  | 02:01 | 01:02 |  | 03:03   |  |  | 06:02-8 |  |
| 81 | 34 | m | 29,6 | 96   | no  | improvement | no  | 12 | 2 | 3 | 2 |  | no | no                                                   | no                                        | no | no |  | po | 226,8s | 90 | 13 | 15 |  | 01:02 | 01:02 |  | 06:02-8 |  |  | 06:02-8 |  |
| 82 | 67 | m | 32   | 94   | N D | fatal       | yes | 24 | 2 | 3 | 2 |  | no | obesity                                              | AH                                        | no | no |  | po | 270,4s | 91 | 10 | 12 |  | 01:01 | 05:01 |  | 05:01   |  |  | 03:01   |  |
| 83 | 79 | m | 23   | 69   | N D | improvement | no  | 11 | 2 | 1 | 1 |  |    | no                                                   | AH, CHD, ACVA, lower limb atherosclerosis | no |    |  | po | 67,5s  | 87 | 03 | 07 |  | 05:01 | 02:01 |  | 02      |  |  | 03:03   |  |
| 84 | 36 | m | 24   | 71   | yes | improvement | no  | 9  | 2 | 2 | 1 |  | no | no                                                   | no                                        | no | no |  | po | 65,1s  | 94 | 01 | 01 |  | 01:01 | 01:01 |  | 05:01   |  |  | 05:01   |  |
| 85 | 50 | f | 30,6 | 86,5 | no  | improvement | no  | 8  | 2 | 3 | 2 |  |    | primary hyperparathyroidism, obesity, nodular goiter | AH                                        |    | BC |  | ne | 37,9g  | 96 | 13 | 15 |  | 05:01 | 01:02 |  | 03:01   |  |  | 06:02-8 |  |
| 86 | 73 | f | 30,1 | 82   | no  | improvement | no  | 8  | 2 | 2 | 1 |  | no | obesity, nodular goiter                              | AH                                        | no | no |  | po | 12,4s  | 95 | 11 | 13 |  | 05:01 | 05:01 |  | 03:01   |  |  | 03:01   |  |
| 87 | 70 | f | 25,3 | 69   | N D | improvement | no  | 14 | 2 | 3 | 2 |  | AT | no                                                   | AH, CHD, aortic atherosclerosis           |    | VC |  | po | 180,3s | 93 | 11 | 15 |  | 05:01 | 01:02 |  | 03:01   |  |  | 06:02-8 |  |
| 88 | 60 | m | 24,5 | 75   | no  | improvement | no  | 8  | 1 | 2 | 1 |  | no | secondary hyperparathyroidism                        | AH                                        | no | no |  | po | 1,9s   | 99 | 01 | 04 |  | 01:01 | 03:01 |  | 05:01   |  |  | 03:02   |  |

|     |    |   |          |    |     |             |    |    |   |   |   |    |    |                                  |                                           |                     |                                            |              |    |    |    |           |           |                 |                 |  |
|-----|----|---|----------|----|-----|-------------|----|----|---|---|---|----|----|----------------------------------|-------------------------------------------|---------------------|--------------------------------------------|--------------|----|----|----|-----------|-----------|-----------------|-----------------|--|
|     |    |   |          |    |     |             |    |    |   |   |   |    |    | m                                |                                           |                     |                                            |              |    |    |    |           |           |                 |                 |  |
| 89  | 72 | f | 31       | 95 | N D | improvement | no | 14 | 3 | 3 | 2 | no | no | DM2, obesity                     | AH                                        | no                  | no                                         | 151,po<br>5s | 91 | 01 | 07 | 01:0<br>1 | 02:0<br>1 | 05:01           | 02              |  |
| 90  | 78 | m | 23,<br>9 | 65 | N D | improvement | no | 21 | 3 | 4 | 2 | no | no | no                               | lower limb<br>atherosclerosis             | chronic<br>leukemia | no                                         | 294,po<br>4s | 87 | 12 | 15 | 05:0<br>1 | 01:0<br>2 | 03:01           | 06:02-8         |  |
| 91  | 58 | m | 33,<br>9 | 90 | no  | improvement | no | 15 | 4 | 3 | 2 | no | no | obesity                          | AH                                        | no                  | no                                         | po<br>10,7s  | 92 | 01 | 15 | 01:0<br>1 | 01:0<br>2 | 05:01           | 06:02-8         |  |
| 92  | 71 | f | 38       | 90 | N D | improvement | no | 18 | 3 | 2 | 1 | AT | no | DM2, obesity                     | AH                                        | no                  | chronic<br>bronchitis                      | po<br>40,4s  | 93 | 01 | 03 | 01:0<br>1 | 05:0<br>1 | 05:01           | 02              |  |
| 93  | 67 | m | 23       | 65 | no  | improvement | no | 11 | 3 | 3 | 2 | no | no | nodular goiter                   | AH                                        | no                  | no                                         | ne<br>45,2g  | 95 | 14 | 15 | 01:0<br>1 | 01:0<br>2 | 05:02/05:0<br>4 | 06:02-8         |  |
| 94  | 71 | f | 16,<br>9 | 45 | yes | improvement | no | 19 | 2 | 1 | 1 | no | no | no                               | MI                                        | no                  | no                                         | ne<br>31,1g  | 84 | 13 | 16 | 01:0<br>3 | 01:0<br>2 | 06:02-8         | 05:02/05:0<br>4 |  |
| 95  | 68 | f | 28       | 82 | N D | improvement | no | 10 | 1 | 3 | 2 | no | no | no                               | AH, CHD,<br>aortic<br>atherosclerosis     | no                  | pulmonary<br>hypertension                  | ne<br>32,2g  | 96 | 01 | 07 | 01:0<br>1 | 02:0<br>1 | 05:01           | 03:03           |  |
| 96  | 88 | m | 26,<br>3 | 70 | no  | improvement | no | 12 | 2 | 3 | 2 | no | no | secondary<br>hyperparathyroidism | AH, CHD,<br>AF, aortic<br>atherosclerosis | no                  | no                                         | ne<br>90,2g  | 94 | 09 | 14 | 03:0<br>1 | 05:0<br>1 | 03:03           | 03:01           |  |
| 97  | 41 | m | 30,<br>9 | 98 | N D | improvement | no | 11 | 1 | 3 | 2 | no | no | obesity                          | no                                        | no                  | no                                         | 138,po<br>1s | 95 | 01 | 09 | 01:0<br>1 | 03:0<br>1 | 05:01           | 03:03           |  |
| 98  | 57 | m | 24,<br>5 | 65 | no  | improvement | no | 10 | 1 | 3 | 2 | no | no | no                               | no                                        | no                  | no                                         | ne<br>44,8g  | 96 | 07 | 10 | 02:0<br>1 | 01:0<br>1 | 02              | 05:01           |  |
| 99  | 43 | m | 27,<br>4 | 97 | no  | improvement | no | 13 | 3 | 3 | 2 | no | no | no                               | no                                        | no                  | history of the<br>right-sided<br>pneumonia | 229,po<br>5s | 91 | 07 | 15 | 02:0<br>1 | 01:0<br>2 | 03:03           | 06:02-8         |  |
| 100 | 72 | f | 32       | 87 | no  | improvement | no | 16 | 3 | 3 | 2 | no | no | obesity                          | AH                                        | no                  | no                                         | 121,po<br>6s | 90 | 07 | 12 | 02:0<br>1 | 05:0<br>1 | 02              | 03:01           |  |

Designations: f - female; m -male; ND – no data; IMV – invasive mechanical ventilation; CT – computer tomography; AID – autoimmune diseases; AT – autoimmune thyroiditis; ED – endocrine diseases; BA –bronchial asthma; RA – rheumatoid arthritis; DM2 –diabetes mellitus type 2; CVD – cardiovascular diseases; AH – arterial hypertension; CHF – chronic heart failure; AF – atrial fibrillation; CHD – coronary heart disease; RBBB – right bundle branch block; ACVA – acute cerebrovascular accident;



OD – oncological diseases; BC – breast cancer; LD – lung diseases; CRP – C-reactive protein; SARS-CoV-2 severe acute respiratory syndrome coronavirus 2; RNA – ribonucleic acid; MI – myocardial infarction; VC- vulvar cancer; neg – negative; pos - positive.
